# Supplementary material for: Assessment of smoke plume height products derived from multisource satellite observations using lidar-derived height metrics for wildfires in the western US
Source: Copernicus journal article supplement (doi:10.5194/acp-24-3673-2024), 2024-03-25
Supplement: Supplementary file 1 [file acp-24-3673-2024-supplement.pdf]

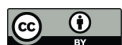

*Supplement of*

**Assessment of smoke plume height products derived from multisource satellite observations using lidar-derived height metrics for wildfires in the western US**

**Jingting Huang et al.**

*Correspondence to:* Jingting Huang ([jingting.huang@uga.edu](mailto:jingting.huang@uga.edu))

The copyright of individual parts of the supplement might differ from the article licence.

**Table S1: Statistical evaluation of satellite-derived wildfire SPH products against WCL-determined SPH observations using the spatial averaging method. N – the number of collocated pairs; SD – standard deviation; Q25 – lower quartile, 25% of the data lie below this value; Q50 – median, 50% of the data lie below this value; Q75 – upper quartile, 25% of the data lie above this value; MB – mean bias; MAE – mean absolute error; RMSE – root mean square error;  $R^2$  – coefficient of determination;  $r$  – Pearson correlation coefficient.**

|                          |                                                           | WCL-Determined SPH  |                     |
|--------------------------|-----------------------------------------------------------|---------------------|---------------------|
|                          |                                                           | SPH <sub>top</sub>  | SPH <sub>ext</sub>  |
| <b>MODIS-Terra/MAIAC</b> | N                                                         | 163                 |                     |
|                          | Lidar Observations Mean $\pm$ 1 SD (km)                   | 2.162 $\pm$ 0.542   | 1.382 $\pm$ 0.368   |
|                          | Satellite Retrievals Mean $\pm$ 1 SD (km)                 | 0.733 $\pm$ 0.447   |                     |
|                          | Lidar Observations <sup>Max</sup> / <sub>Min</sub> (km)   | 3.903/1.254         | 2.253/0.800         |
|                          | Satellite Retrievals <sup>Max</sup> / <sub>Min</sub> (km) | 2.114/0.015         |                     |
|                          | Lidar Observations Q25, Q50, Q75 (km)                     | 1.776, 2.064, 2.508 | 1.131, 1.298, 1.581 |
|                          | Satellite Retrievals Q25, Q50, Q75 (km)                   | 0.438, 0.687, 0.903 |                     |
|                          | MB (km)                                                   | -1.429              | -0.650              |
|                          | MAE (km)                                                  | 1.429               | 0.673               |
|                          | RMSE (km)                                                 | 1.591               | 0.822               |
|                          | $R^2$                                                     | -7.618              | -3.995              |
| $r$                      | 0.008                                                     | <b>0.247 **</b>     |                     |
| <b>MODIS-Aqua/MAIAC</b>  | N                                                         | 114                 |                     |
|                          | Lidar Observations Mean $\pm$ 1 SD (km)                   | 2.686 $\pm$ 0.797   | 1.790 $\pm$ 0.644   |
|                          | Satellite Retrievals Mean $\pm$ 1 SD (km)                 | 0.425 $\pm$ 0.262   |                     |
|                          | Lidar Observations <sup>Max</sup> / <sub>Min</sub> (km)   | 4.215/1.374         | 3.422/0.800         |
|                          | Satellite Retrievals <sup>Max</sup> / <sub>Min</sub> (km) | 0.935/0.025         |                     |
|                          | Lidar Observations Q25, Q50, Q75 (km)                     | 2.063, 2.627, 3.350 | 1.274, 1.728, 2.325 |
|                          | Satellite Retrievals Q25, Q50, Q75 (km)                   | 0.192, 0.379, 0.697 |                     |
|                          | MB (km)                                                   | -2.261              | -1.365              |
|                          | MAE (km)                                                  | 2.261               | 1.365               |
|                          | RMSE (km)                                                 | 2.393               | 1.525               |
|                          | $R^2$                                                     | -8.009              | -4.617              |
| $r$                      | <b>0.219 *</b>                                            | 0.057               |                     |
| <b>MISR/MERLIN</b>       | N                                                         | 90                  |                     |
|                          | Lidar Observations Mean $\pm$ 1 SD (km)                   | 2.216 $\pm$ 0.506   | 1.498 $\pm$ 0.449   |
|                          | Satellite Retrievals Mean $\pm$ 1 SD (km)                 | 2.124 $\pm$ 0.625   |                     |
|                          | Lidar Observations <sup>Max</sup> / <sub>Min</sub> (km)   | 2.982/1.254         | 2.253/0.853         |
|                          | Satellite Retrievals <sup>Max</sup> / <sub>Min</sub> (km) | 3.029/0.625         |                     |
|                          | Lidar Observations Q25, Q50, Q75 (km)                     | 1.791, 2.204, 2.648 | 1.129, 1.428, 1.969 |
|                          | Satellite Retrievals Q25, Q50, Q75 (km)                   | 1.658, 2.083, 2.801 |                     |
|                          | MB (km)                                                   | -0.092              | 0.626               |
|                          | MAE (km)                                                  | 0.368               | 0.719               |
|                          | RMSE (km)                                                 | 0.554               | 0.788               |
|                          | $R^2$                                                     | -0.196              | -2.076              |
| $r$                      | <b>0.551 **</b>                                           | <b>0.648 **</b>     |                     |

Table S1: Cont.

|             |                                              | WCL-Determined SPH  |                     |
|-------------|----------------------------------------------|---------------------|---------------------|
|             |                                              | SPH <sub>top</sub>  | SPH <sub>ext</sub>  |
| VIIRS/ASHE  | N                                            | 130                 |                     |
|             | Lidar Observations Mean $\pm$ 1 SD (km)      | 2.823 $\pm$ 0.999   | 1.895 $\pm$ 0.890   |
|             | Satellite Retrievals Mean $\pm$ 1 SD (km)    | 2.707 $\pm$ 1.149   |                     |
|             | Lidar Observations <sup>Max/Min</sup> (km)   | 5.493/1.497         | 4.003/0.811         |
|             | Satellite Retrievals <sup>Max/Min</sup> (km) | 4.603/0.227         |                     |
|             | Lidar Observations Q25, Q50, Q75 (km)        | 1.977, 2.904, 3.318 | 1.094, 1.629, 2.489 |
|             | Satellite Retrievals Q25, Q50, Q75 (km)      | 2.263, 2.661, 3.625 |                     |
|             | MB (km)                                      | -0.106              | 0.823               |
|             | MAE (km)                                     | 1.196               | 1.599               |
|             | RMSE (km)                                    | 1.694               | 1.814               |
|             | $R^2$                                        | -1.876              | -3.152              |
| $r$         | <b>-0.236 *</b>                              | <b>-0.246 *</b>     |                     |
| TROPOMI/ALH | N                                            | 127                 |                     |
|             | Lidar Observations Mean $\pm$ 1 SD (km)      | 2.677 $\pm$ 1.075   | 1.894 $\pm$ 0.936   |
|             | Satellite Retrievals Mean $\pm$ 1 SD (km)    | 2.001 $\pm$ 0.541   |                     |
|             | Lidar Observations <sup>Max/Min</sup> (km)   | 5.493/1.374         | 4.003/0.734         |
|             | Satellite Retrievals <sup>Max/Min</sup> (km) | 3.425/1.412         |                     |
|             | Lidar Observations Q25, Q50, Q75 (km)        | 1.718, 2.337, 3.308 | 1.019, 1.542, 2.684 |
|             | Satellite Retrievals Q25, Q50, Q75 (km)      | 1.546, 1.759, 2.391 |                     |
|             | MB (km)                                      | -0.676              | 0.107               |
|             | MAE (km)                                     | 0.850               | 0.843               |
|             | RMSE (km)                                    | 1.324               | 0.980               |
|             | $R^2$                                        | -0.518              | -0.094              |
| $r$         | 0.130                                        | <b>0.218 *</b>      |                     |

Note that  $r$  in bold demonstrate a statistically significant relationship between the two variables; the symbol \* signifies a  $p$  value  $< 0.05$  and \*\* indicates a  $p$  value  $< 0.01$ . A lower  $p$ -value suggests a higher level of statistical significance.

Table S2: Statistical evaluation of satellite-derived wildfire SPH products against WCL-determined SPH observations using the matched-pair method. N – the number of collocated pairs; SD – standard deviation; Q25 – lower quartile, 25% of the data lie below this value; Q50 – median, 50% of the data lie below this value; Q75 – upper quartile, 25% of the data lie above this value; MB – mean bias; MAE – mean absolute error; RMSE – root mean square error;  $R^2$  – coefficient of determination;  $r$  – Pearson correlation coefficient.

|                   |                                              | WCL-Determined SPH  |                     |
|-------------------|----------------------------------------------|---------------------|---------------------|
|                   |                                              | SPH <sub>top</sub>  | SPH <sub>ext</sub>  |
| MODIS-Terra/MAIAC | N                                            | 163                 |                     |
|                   | Lidar Observations Mean ± 1 SD (km)          | 2.162 ± 0.542       | 1.382 ± 0.368       |
|                   | Satellite Retrievals Mean ± 1 SD (km)        | 0.700 ± 0.550       |                     |
|                   | Lidar Observations <sup>Max/Min</sup> (km)   | 3.903/1.254         | 2.253/0.800         |
|                   | Satellite Retrievals <sup>Max/Min</sup> (km) | 2.650/0.004         |                     |
|                   | Lidar Observations Q25, Q50, Q75 (km)        | 1.776, 2.064, 2.508 | 1.131, 1.298, 1.581 |
|                   | Satellite Retrievals Q25, Q50, Q75 (km)      | 0.325, 0.643, 0.952 |                     |
|                   | MB (km)                                      | -1.462              | -0.683              |
|                   | MAE (km)                                     | 1.462               | 0.737               |
|                   | RMSE (km)                                    | 1.664               | 0.919               |
|                   | $R^2$                                        | -8.419              | -5.246              |
| $r$               | -0.055                                       | 0.146               |                     |
| MODIS-Aqua/MAIAC  | N                                            | 114                 |                     |
|                   | Lidar Observations Mean ± 1 SD (km)          | 2.686 ± 0.797       | 1.790 ± 0.644       |
|                   | Satellite Retrievals Mean ± 1 SD (km)        | 0.370 ± 0.258       |                     |
|                   | Lidar Observations <sup>Max/Min</sup> (km)   | 4.215/1.374         | 3.422/0.800         |
|                   | Satellite Retrievals <sup>Max/Min</sup> (km) | 1.109/0.025         |                     |
|                   | Lidar Observations Q25, Q50, Q75 (km)        | 2.063, 2.627, 3.350 | 1.274, 1.728, 2.325 |
|                   | Satellite Retrievals Q25, Q50, Q75 (km)      | 0.146, 0.308, 0.579 |                     |
|                   | MB (km)                                      | -2.317              | -1.419              |
|                   | MAE (km)                                     | 2.315               | 1.419               |
|                   | RMSE (km)                                    | 2.444               | 1.564               |
|                   | $R^2$                                        | -8.398              | -4.904              |
| $r$               | <b>0.220 *</b>                               | 0.148               |                     |
| MISR/MERLIN       | N                                            | 90                  |                     |
|                   | Lidar Observations Mean ± 1 SD (km)          | 2.216 ± 0.506       | 1.498 ± 0.449       |
|                   | Satellite Retrievals Mean ± 1 SD (km)        | 2.114 ± 0.731       |                     |
|                   | Lidar Observations <sup>Max/Min</sup> (km)   | 2.982/1.254         | 2.253/0.853         |
|                   | Satellite Retrievals <sup>Max/Min</sup> (km) | 3.480/0.625         |                     |
|                   | Lidar Observations Q25, Q50, Q75 (km)        | 1.791, 2.204, 2.648 | 1.129, 1.428, 1.969 |
|                   | Satellite Retrievals Q25, Q50, Q75 (km)      | 1.576, 1.965, 2.729 |                     |
|                   | MB (km)                                      | -0.102              | 0.616               |
|                   | MAE (km)                                     | 0.494               | 0.782               |
|                   | RMSE (km)                                    | 0.688               | 0.867               |
|                   | $R^2$                                        | -0.846              | -2.726              |
| $r$               | <b>0.444 **</b>                              | <b>0.556 **</b>     |                     |

Table S2: Cont.

|             |                                                           | WCL-Determined SPH  |                     |
|-------------|-----------------------------------------------------------|---------------------|---------------------|
|             |                                                           | SPH <sub>top</sub>  | SPH <sub>ext</sub>  |
| VIIRS/ASHE  | N                                                         | 130                 |                     |
|             | Lidar Observations Mean $\pm$ 1 SD (km)                   | 2.823 $\pm$ 0.999   | 1.895 $\pm$ 0.890   |
|             | Satellite Retrievals Mean $\pm$ 1 SD (km)                 | 2.707 $\pm$ 1.165   |                     |
|             | Lidar Observations <sup>Max</sup> / <sub>Min</sub> (km)   | 5.493/1.497         | 4.003/0.811         |
|             | Satellite Retrievals <sup>Max</sup> / <sub>Min</sub> (km) | 4.930/0.231         |                     |
|             | Lidar Observations Q25, Q50, Q75 (km)                     | 1.977, 2.904, 3.318 | 1.094, 1.629, 2.489 |
|             | Satellite Retrievals Q25, Q50, Q75 (km)                   | 2.060, 2.683, 3.579 |                     |
|             | MB (km)                                                   | -0.116              | 0.812               |
|             | MAE (km)                                                  | 1.190               | 1.594               |
|             | RMSE (km)                                                 | 1.697               | 1.806               |
|             | $R^2$                                                     | -1.887              | -3.115              |
| $r$         | <b>-0.220 *</b>                                           | <b>-0.220 *</b>     |                     |
| TROPOMI/ALH | N                                                         | 127                 |                     |
|             | Lidar Observations Mean $\pm$ 1 SD (km)                   | 2.677 $\pm$ 1.075   | 1.894 $\pm$ 0.936   |
|             | Satellite Retrievals Mean $\pm$ 1 SD (km)                 | 2.052 $\pm$ 0.588   |                     |
|             | Lidar Observations <sup>Max</sup> / <sub>Min</sub> (km)   | 5.493/1.374         | 4.003/0.734         |
|             | Satellite Retrievals <sup>Max</sup> / <sub>Min</sub> (km) | 3.425/1.412         |                     |
|             | Lidar Observations Q25, Q50, Q75 (km)                     | 1.718, 2.337, 3.308 | 1.019, 1.542, 2.684 |
|             | Satellite Retrievals Q25, Q50, Q75 (km)                   | 1.546, 1.802, 2.431 |                     |
|             | MB (km)                                                   | -0.625              | 0.158               |
|             | MAE (km)                                                  | 0.832               | 0.847               |
|             | RMSE (km)                                                 | 1.304               | 0.991               |
|             | $R^2$                                                     | -0.472              | -0.121              |
| $r$         | 0.151                                                     | <b>0.241 **</b>     |                     |

Note that  $r$  in bold demonstrate a statistically significant relationship between the two variables; the symbol \* signifies a  $p$  value  $< 0.05$  and \*\* indicates a  $p$  value  $< 0.01$ . A lower  $p$ -value suggests a higher level of statistical significance.

**Table S3: Location and elevation above mean sea level (AMSL) of balloon sounding stations near the UWKA flight operations during the August 2018 BB-FLUX project.**

| <b>Station ID</b> | <b>Latitude</b> | <b>Longitude</b> | <b>Elevation (m AMSL)</b> |
|-------------------|-----------------|------------------|---------------------------|
| <b>BOI</b>        | 43.56           | -116.21          | 874                       |
| <b>LKN</b>        | 40.86           | -115.73          | 1608                      |
| <b>MFR</b>        | 42.36           | -122.86          | 405                       |
| <b>SLC</b>        | 40.77           | -111.95          | 1289                      |

**Table S4: Physical schemes used in the WRF simulations. A 4 km (grid spacing) domain across the western US with a domain size of 629 × 501 (east-west direction × north-south direction) in the WRF configuration is centered at 40° N and 116° W.**

| <b>Physical Process</b>          | <b>Scheme</b>                                              |
|----------------------------------|------------------------------------------------------------|
| <b>Microphysics</b>              | Purdue Lin Scheme (Chen and Sun, 2002)                     |
| <b>Convection</b>                | Grell–Devenyi Ensemble Scheme (Grell and Dévényi, 2002)    |
| <b>Short/Long-wave radiation</b> | RRTMG Shortwave and Longwave Schemes (Iacono et al., 2008) |
| <b>Planetary boundary layer</b>  | Yonsei University scheme (Hong et al., 2006)               |
| <b>Surface layer</b>             | Revised MM5 Scheme (Jiménez et al., 2012)                  |
| <b>Land surface</b>              | Unified Noah Land Surface Model (Tewari et al., 2004)      |

Location: 43.254°N, 113.91°W  
Flight Name: 20180803a

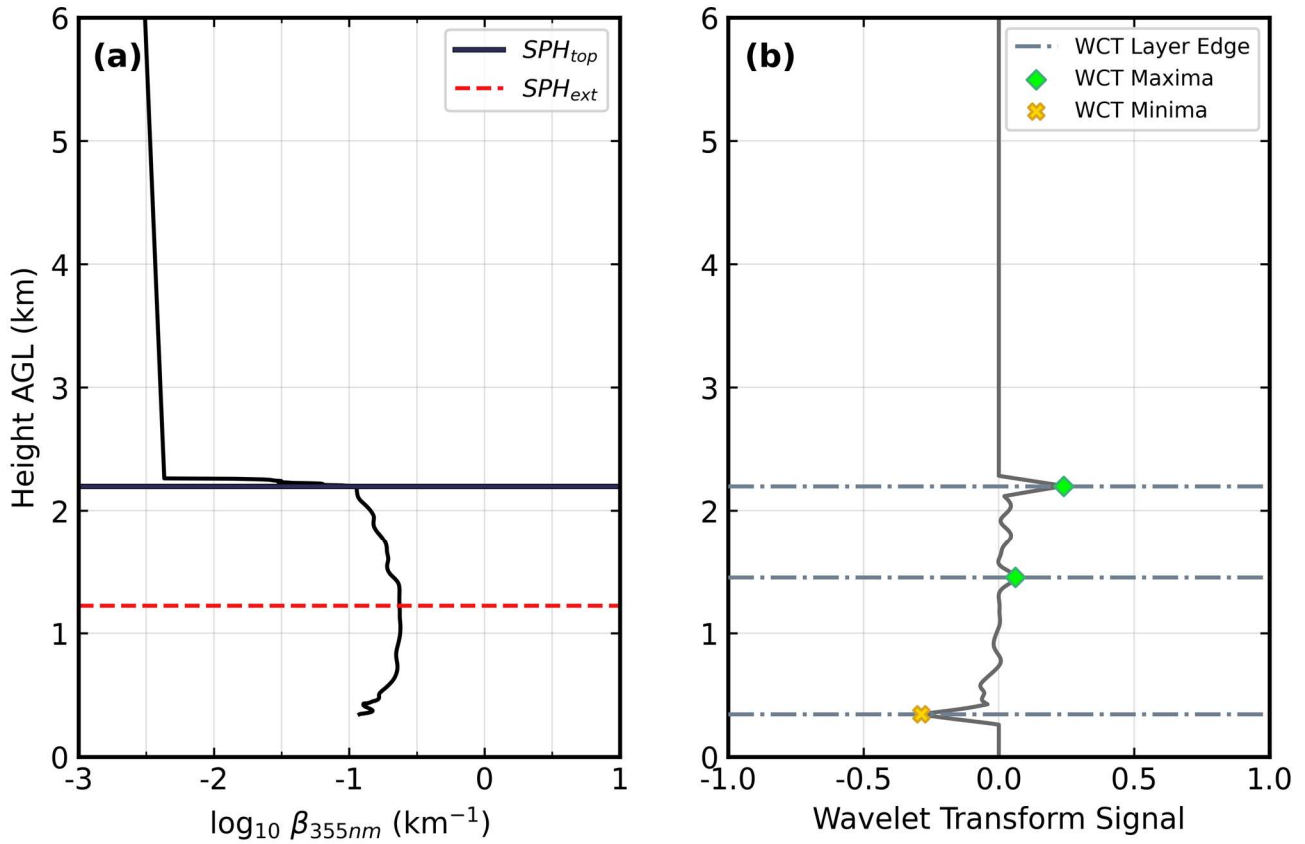

Figure S1: An example of a single-layered aerosol structure is presented here, as evidenced by (a) the WCL aerosol extinction coefficient profile at 355 nm derived from the composite airborne lidar vertical cross-section, and (b) the resulting WCT profile, on August 3, 2018, at a location (43.254° N, 113.91° W). In panel (a), the dashed red line represents the calculated  $SPH_{top}$ , while the calculated  $SPH_{ext}$  is shown as the solid blue line for comparison. In panel (b), the WCT-detected aerosol layer top (or bottom) is marked by the horizontal dash-dotted grey line. Chromatic icons denote the local maxima (green, “diamond”) and minima (yellow, “x”) of the signal obtained by the WCT methodology.

Location: 43.424°N, 113.91°W  
Flight Name: 20180803a

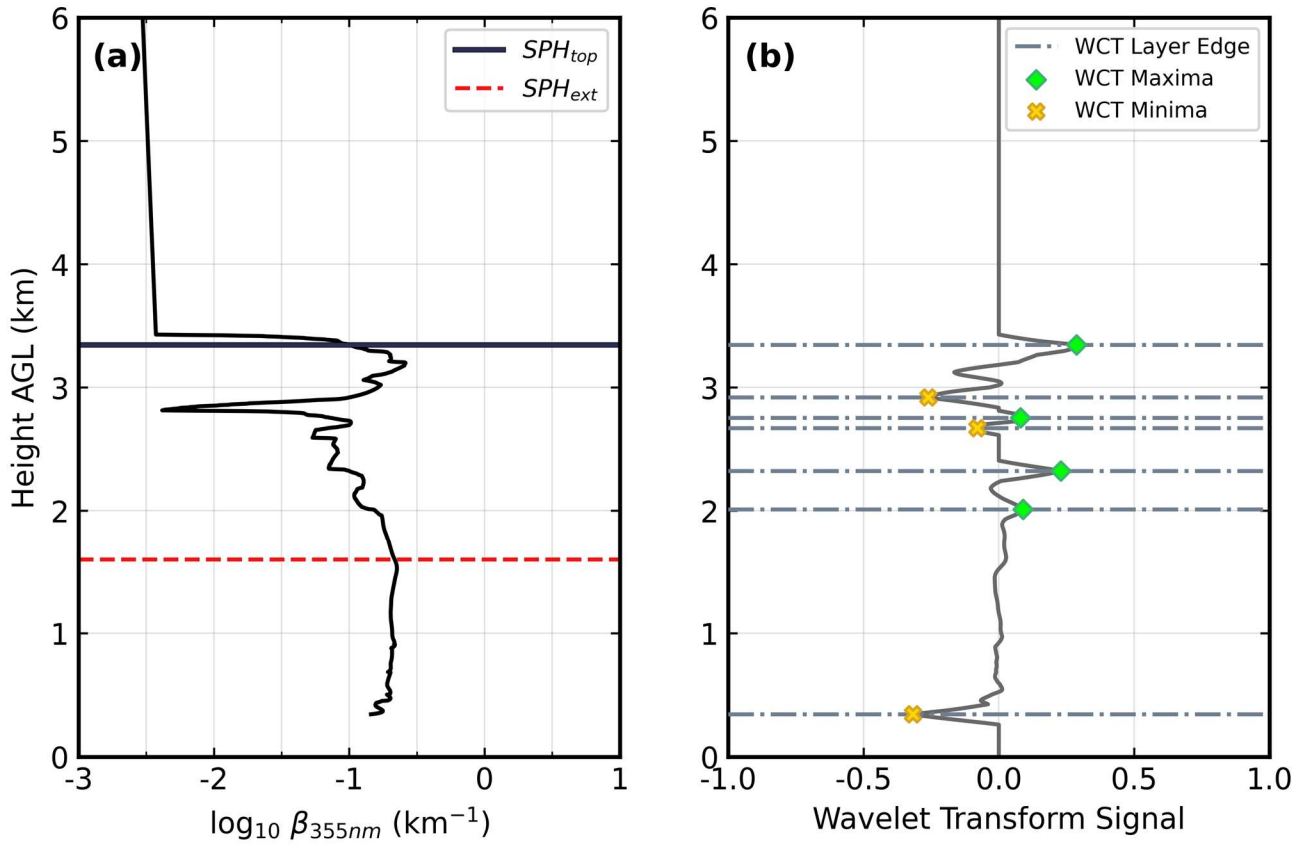

Figure S2: Another example has the same logic as shown in Figure S1, but for a multi-layered aerosol structure case on August 3, 2018, at a location (43.424° N, 113.91° W).



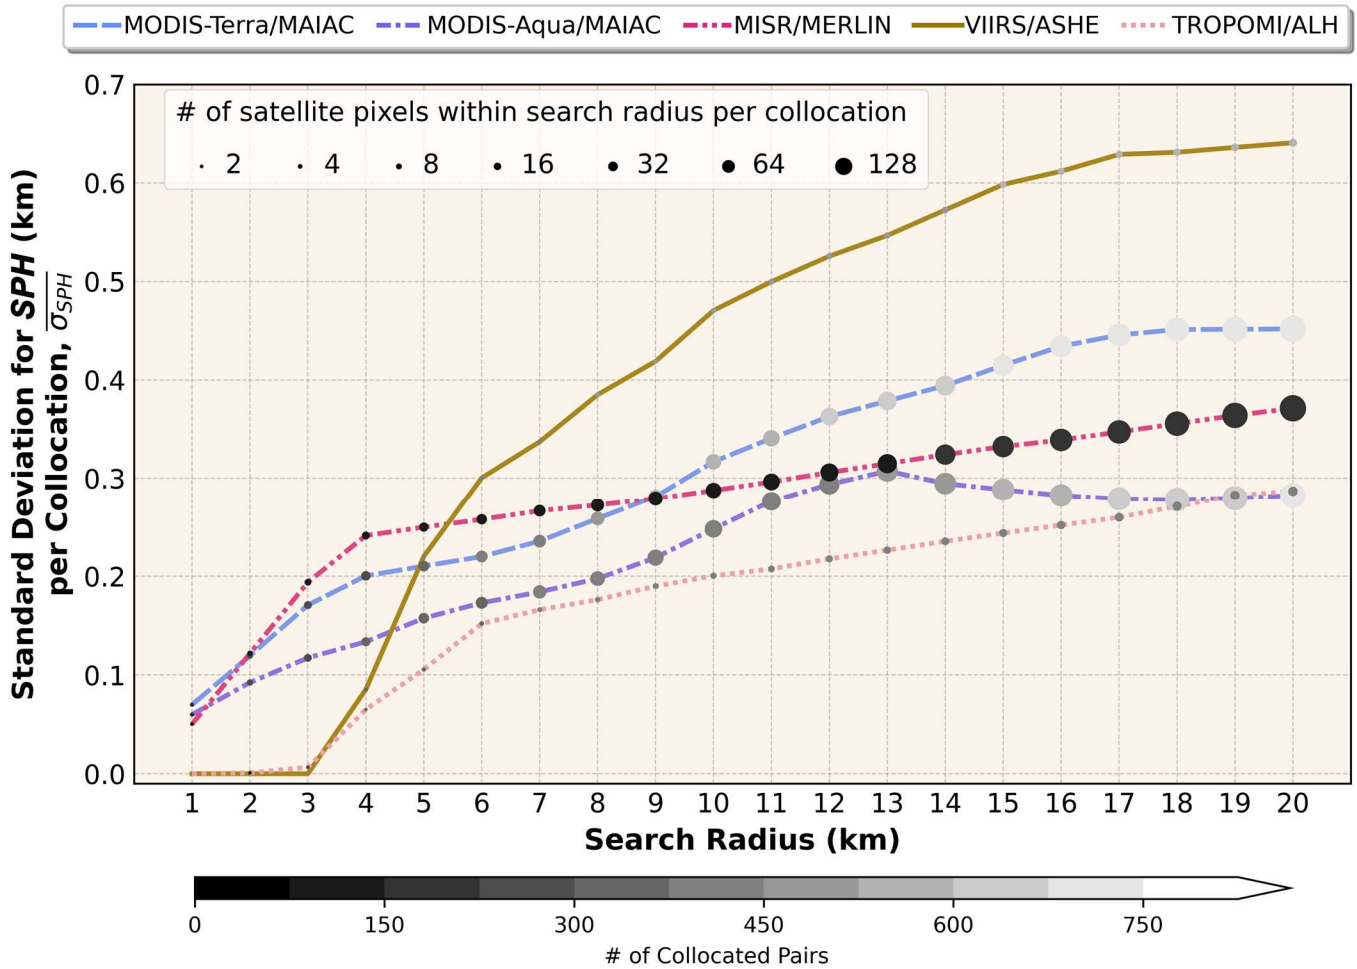

Figure S3: The SD for SPH per collocation across various satellite products (MODIS-Terra/MAIAC, MODIS-Aqua/MAIAC, MISR/MERLIN, VIIRS/ASHE, and TROPOMI/ALH) as a function of the search radius, which pertains to all successful collocations during the August 2018 BB-FLUX field campaign, with a 12-minute searching time window. The color bar indicates the total number of collocated pairs between satellite retrievals and lidar observations. The larger the scatter point size, the greater the number of satellite pixels within the circular area defined by a given search radius. A workflow for the collocation methodology is outlined as follows. First, satellite pixels within a 1 km to 20 km distance from a given lidar point, and whose observation time falls within 12 minutes of that point, are only selected. From this subset, a nearest-neighbor search identifies the closest satellite pixel to the lidar point. When that collocation is found, any nearby satellite pixels within the circular area of a specific search radius are also counted. The collocation process extracts and records data such as the satellite-retrieved SPH value, lidar-determined SPH value, collocation's geolocations, and the number of satellite pixels in the sampling area around the lidar point. Second, as shown in Figure S3, the search radius range is narrowed down when the SDs of the satellite-retrieved SPH products are above zero and when there are at least two adjacent satellite pixels. Finally, the optimal search radius is determined based on the total number of collocations, while ensuring minimal variation in the satellite-retrieved SPH values.

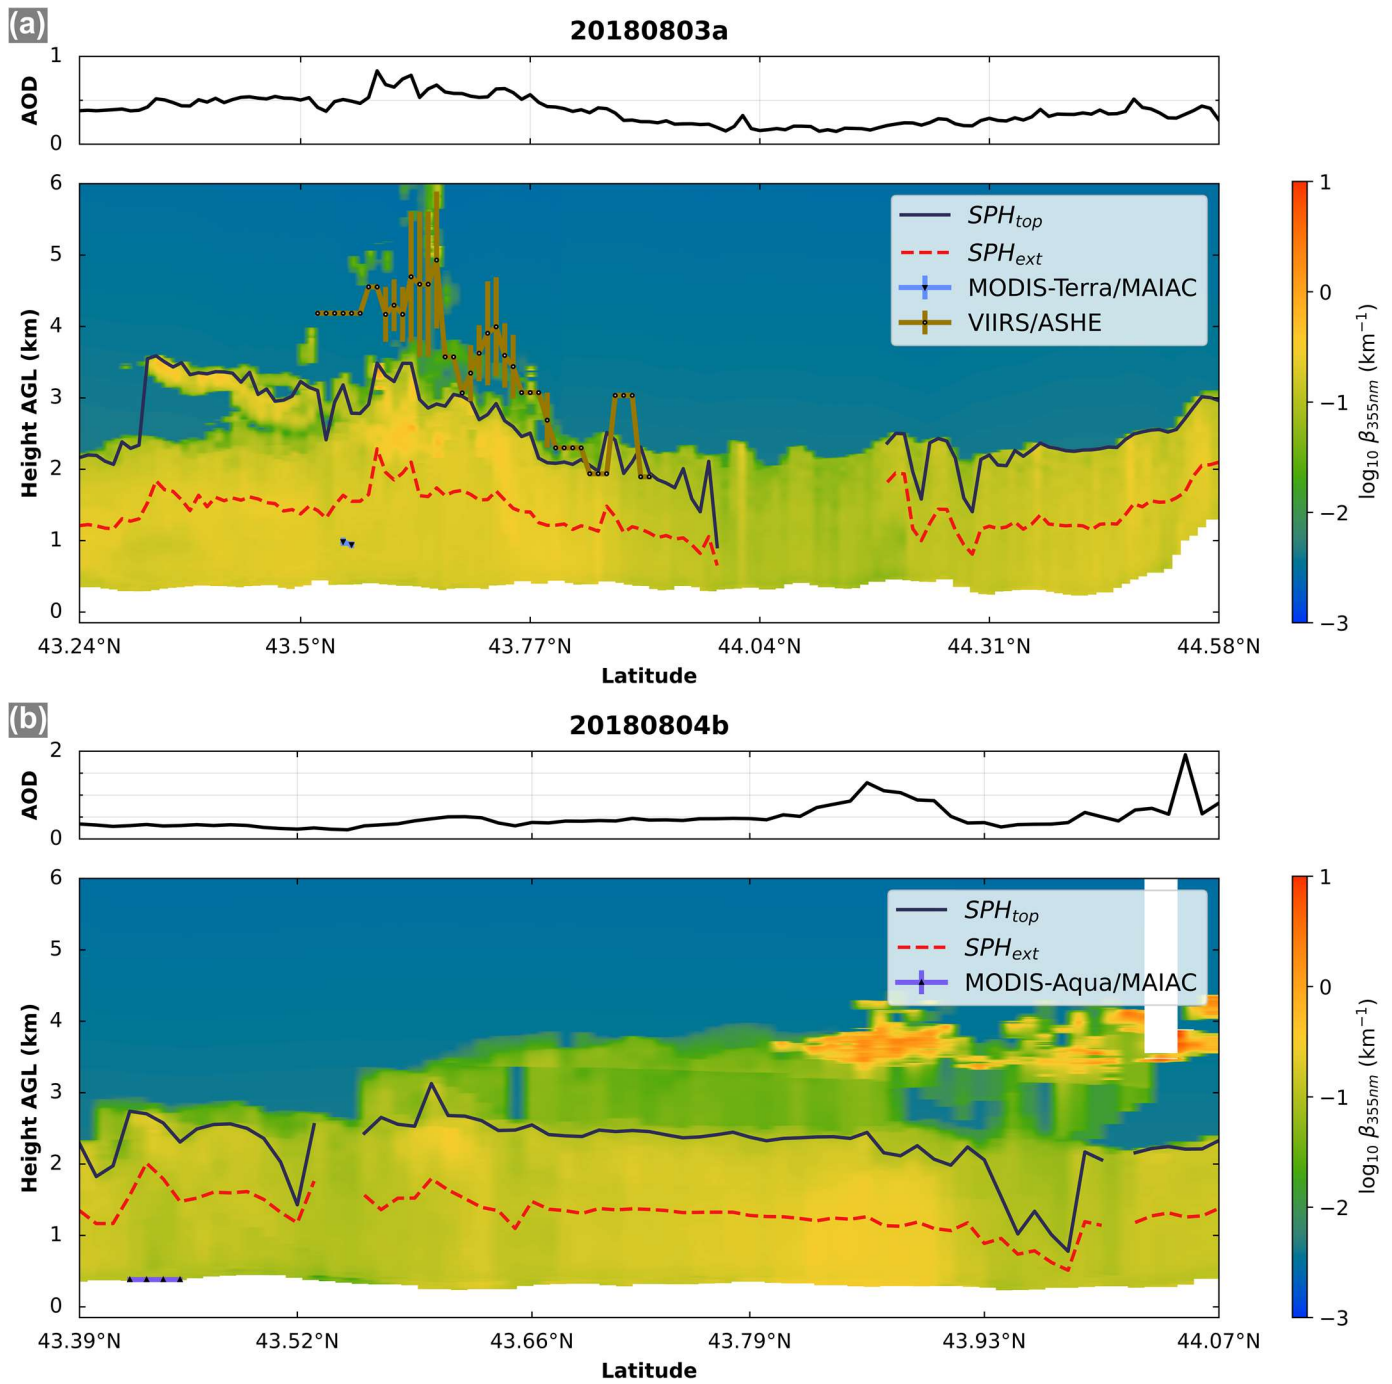

Figure S4: Composite latitude–height cross-sections of WCL vertical aerosol extinction coefficient at 355 nm covering other nine reconstructed flight tracks from the August 2018 BB-FLUX campaign: (a) 0803a; (b) 0804b; (c) 0808b; (d) 0812a; (e) 0820a; (f) 0820b; (g) 0823a; (h) 0824a; (i) 0825a. These cross-sections are overlaid with WCL-determined SPHs (i.e., SPH<sub>top</sub> and SPH<sub>ext</sub>) and satellite-retrieved SPHs, along with corresponding AOD variations.

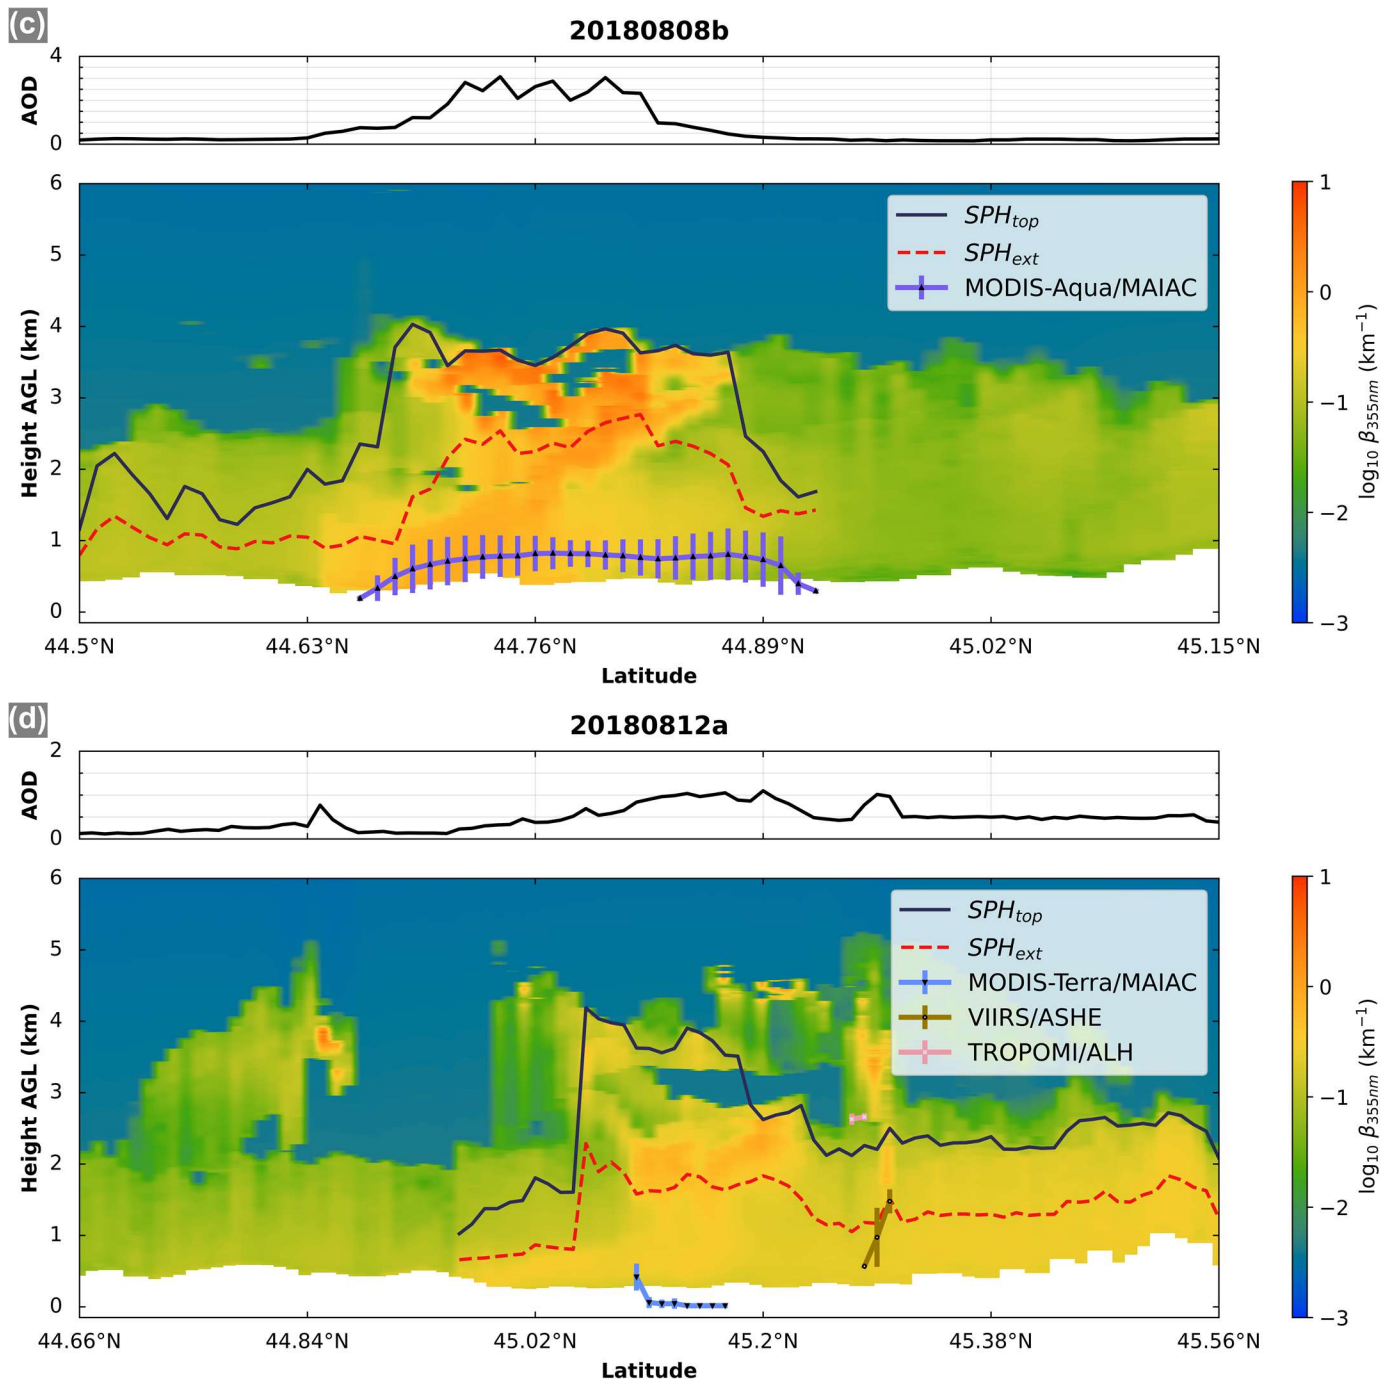

Figure S4: Cont.

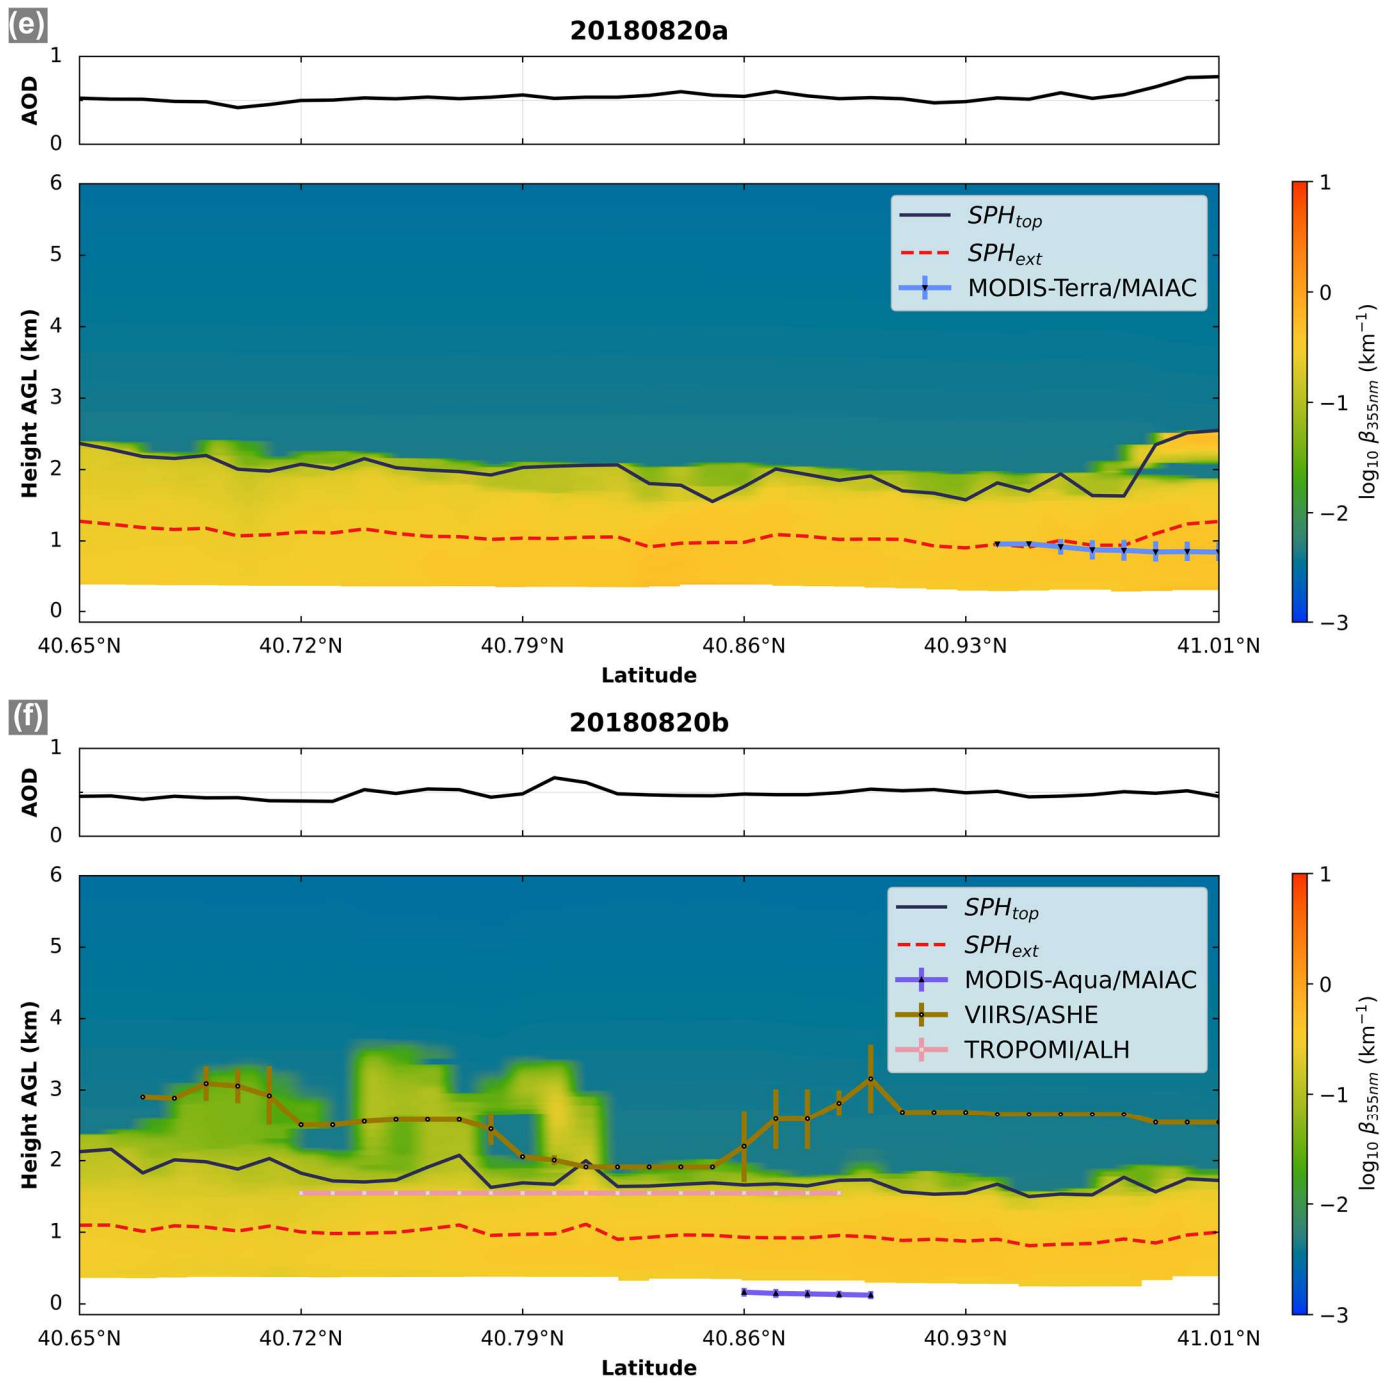

Figure S4: Cont.

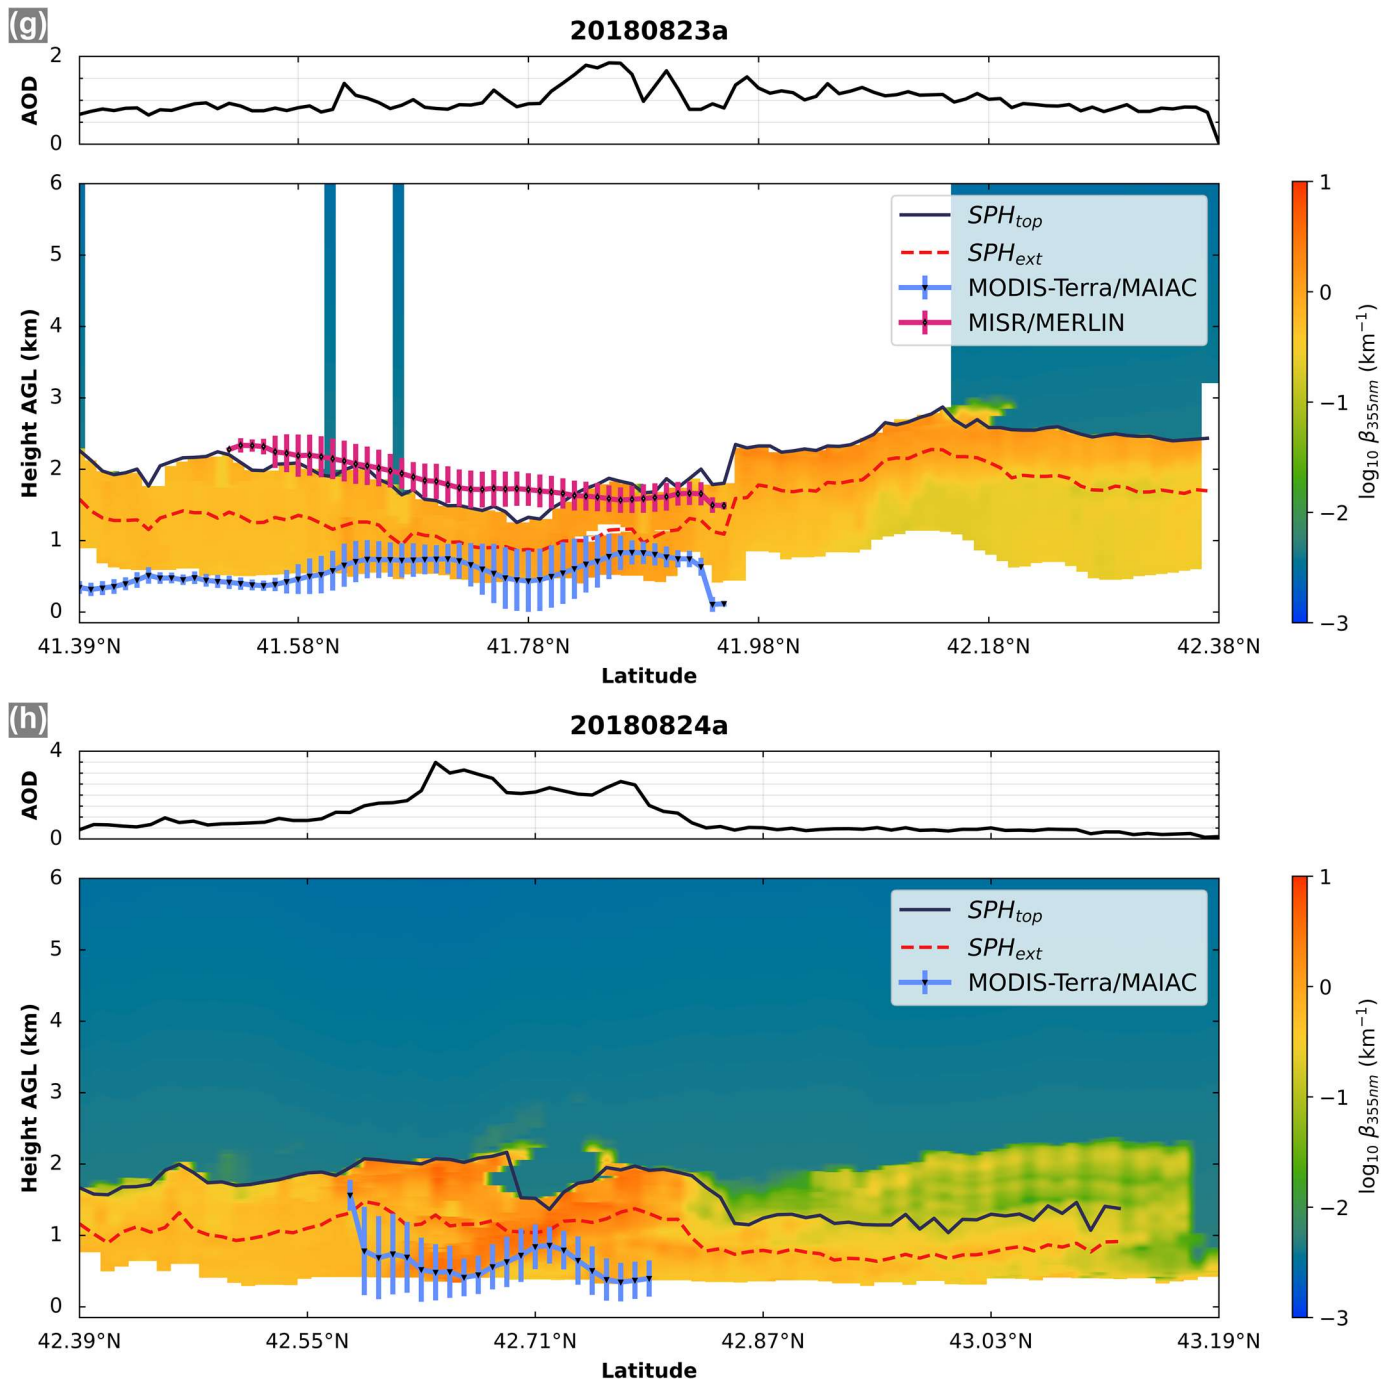

Figure S4: Cont.



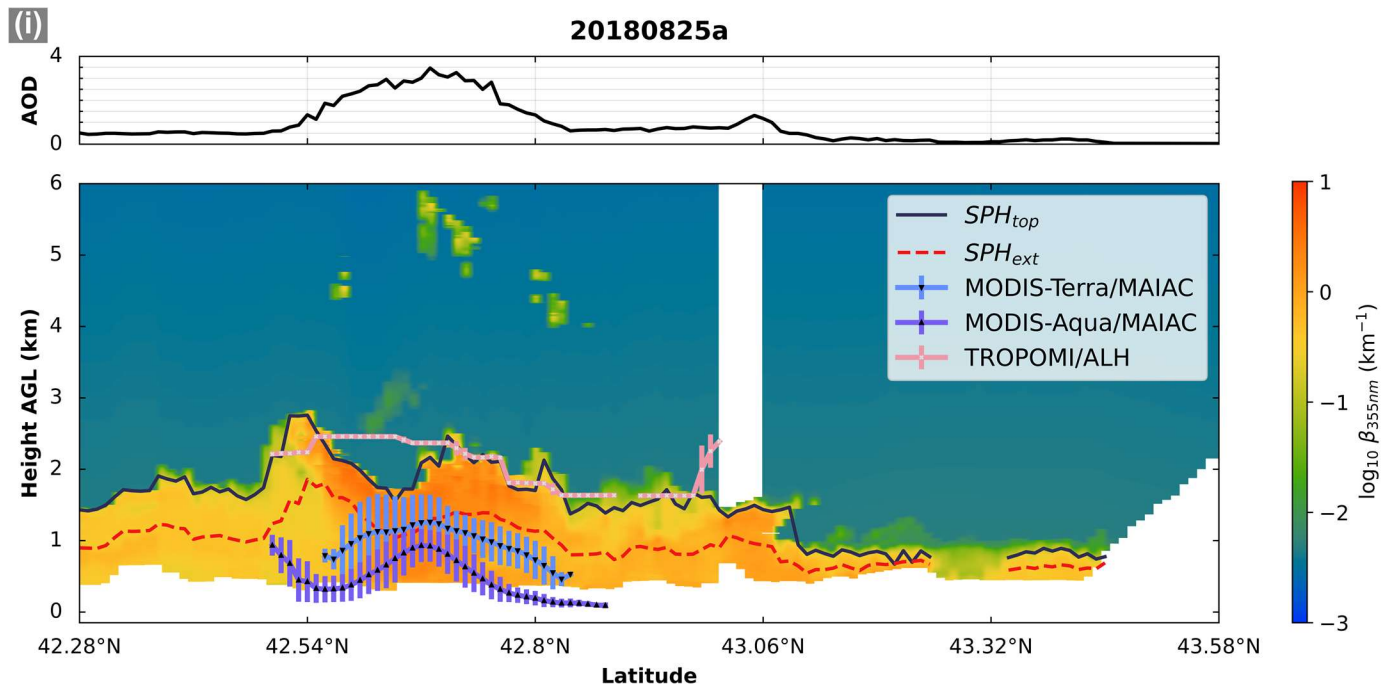

Figure S4: Cont.

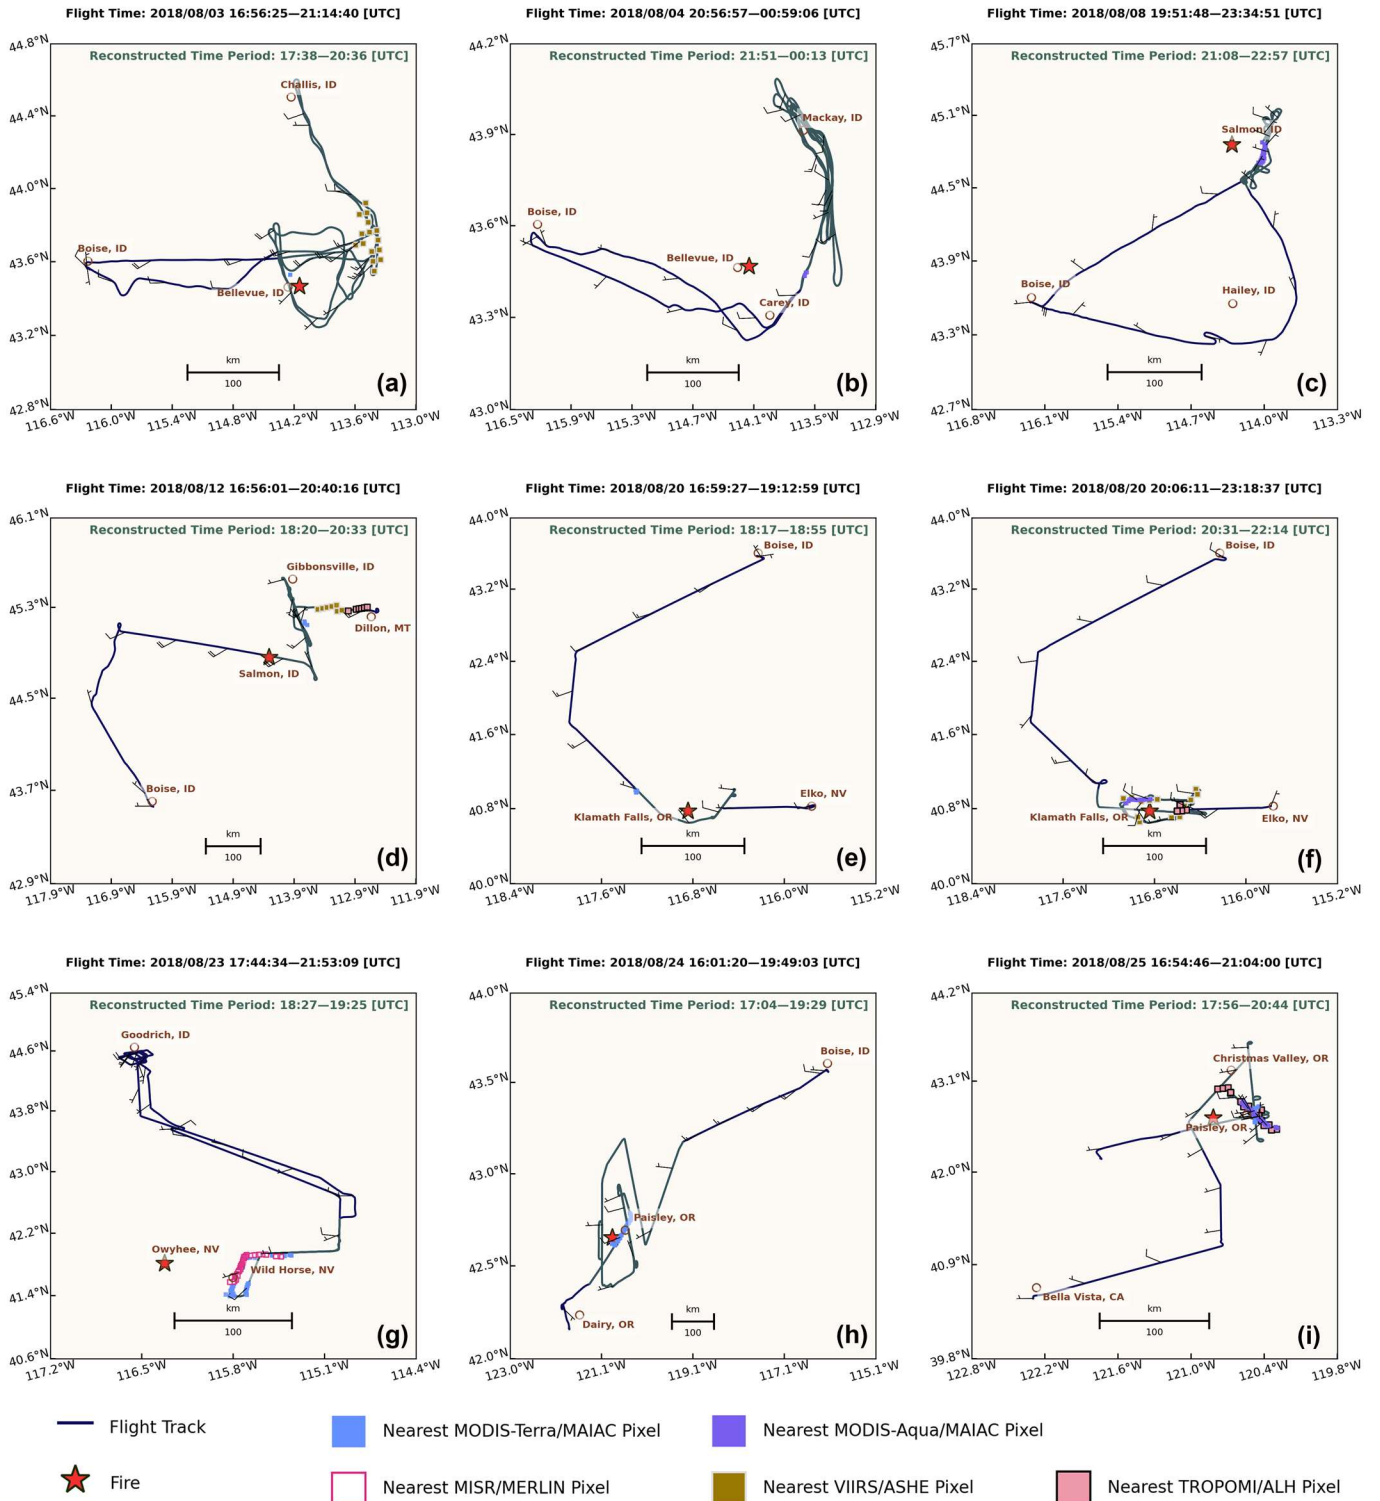

**Figure S5: The other nine UWKA flight tracks selected from the August 2018 BB-FLUX campaign. These tracks are highlighted by their reconstructed time periods and associated with five different types of satellite collocations: (a) 0803a; (b) 0804b; (c) 0808b; (d) 0812a; (e) 0820a; (f) 0820b; (g) 0823a; (h) 0824a; (i) 0825a.**

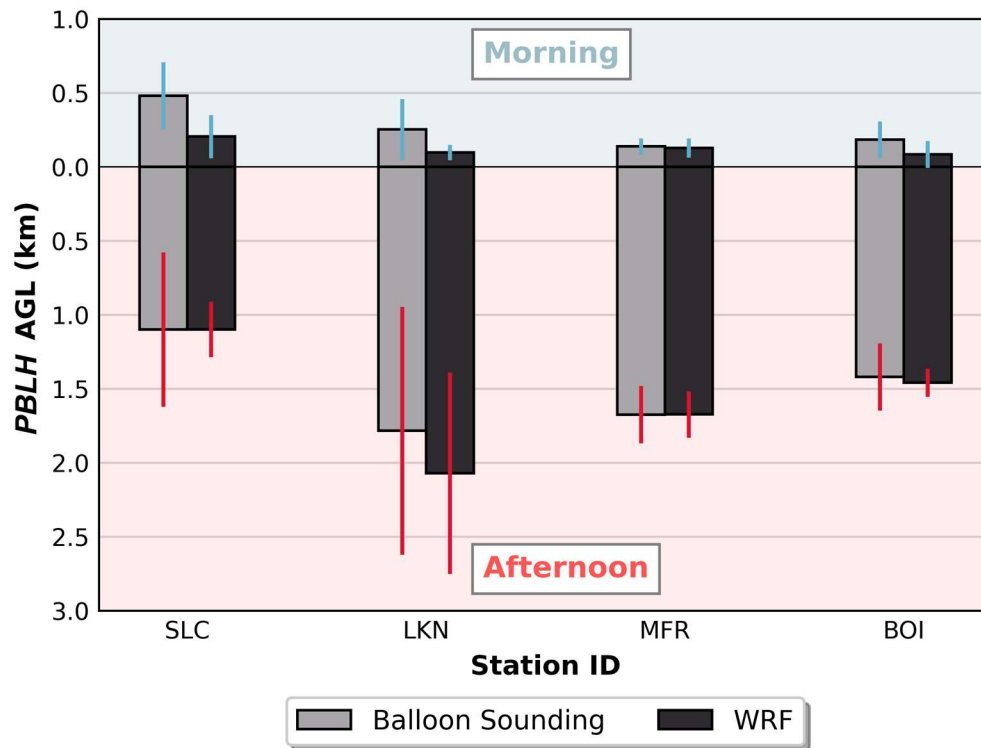

**Figure S6: PBLH averages (with error bars) at 00Z (Afternoon) and at 12Z (Morning), from balloon soundings and WRF simulations in August 2018. Due to uncertainties in the PBLH values computed by the WRF model, these are not used directly. Instead, hourly WRF PBLH is re-calculated in the same way as the balloon data, using either the vertical potential temperature gradient method or the Richardson number method.**

## References

- Chen, S.-H. and Sun, W.-Y.: A one-dimensional time dependent cloud model, *J. Meteorol. Soc. of Jpn. Ser. II*, 80, 99–118, <https://doi.org/10.2151/jmsj.80.99>, 2002.
- Grell, G. A. and Dévényi, D.: A generalized approach to parameterizing convection combining ensemble and data assimilation techniques, *Geophys. Res. Lett.*, 29, 1693, <https://doi.org/10.1029/2002GL015311>, 2002.
- Hong, S.-Y., Noh, Y., and Dudhia, J.: A new vertical diffusion package with an explicit treatment of entrainment processes, *Mon. Weather Rev.*, 134, 2318–2341, <https://doi.org/10.1175/MWR3199.1>, 2006.
- Iacono, M. J., Delamere, J. S., Mlawer, E. J., Shephard, M. W., Clough, S. A., and Collins, W. D.: Radiative forcing by long-lived greenhouse gases: Calculations with the AER radiative transfer models, *J. Geophys. Res.-Atmos.*, 113, D13103, <https://doi.org/10.1029/2008JD009944>, 2008.
- Jiménez, P. A., Dudhia, J., González-Rouco, J. F., Navarro, J., Montávez, J. P., and García-Bustamante, E.: A revised scheme for the WRF surface layer formulation, *Mon. Weather Rev.*, 140, 898–918, <https://doi.org/10.1175/MWR-D-11-00056.1>, 2012.
- Tewari, M., Chen, F., Wang, W., Dudhia, J., LeMone, M. A., Mitchell, K., Ek, M., Gayno, G., Wegiel, J., and Cuenca, R. H.: Implementation and verification of the unified noah land surface model in the WRF model [presentation], in: 20th Conference on Weather Analysis and Forecasting/16th Conference on Numerical Weather Prediction, 11–15 January, <http://n2t.net/ark:/85065/d7fb523p> (last access: 11 June 2023), 2004.
